# Supplementary material for: Probing room-temperature reactivity of H2S, SO2, and NO on the Li2MnO3 crystal surface by experimental and first-principles studies
Source: Royal Society of Chemistry journal article supplement (doi:10.1039/d3nj04075e), 2023-01-01
Supplement: d3nj04075e1.pdf [file d3nj04075e1.pdf]

### ESI file for

## Probing room-temperature reactivity of H<sub>2</sub>S, SO<sub>2</sub>, and NO on Li<sub>2</sub>MnO<sub>3</sub> crystal surface by experimental and first-principles studies

Kaptan Rajput<sup>a,b,1</sup>, Carlos Hernández-Fontes<sup>c,1</sup>, Nishesh Kumar Gupta<sup>d,e,1</sup>, Bijal R. Mehta<sup>a</sup>, Srungarpu N. Achary<sup>f,g</sup>, Herlys Viltres<sup>h</sup>, Heriberto Pfeiffer<sup>c\*</sup>, Debesh R. Roy<sup>a</sup>, Kwang Soo Kim<sup>d,e,\*\*</sup>

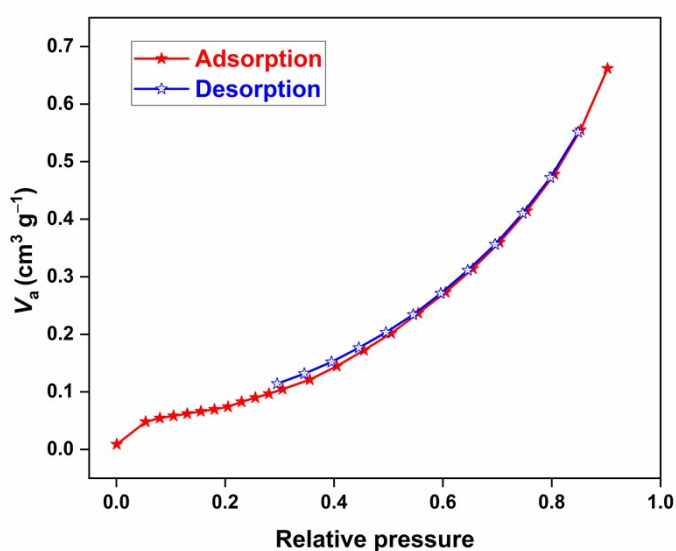

Figure S1. N<sub>2</sub> adsorption-desorption isotherm of Li<sub>2</sub>MnO<sub>3</sub>.

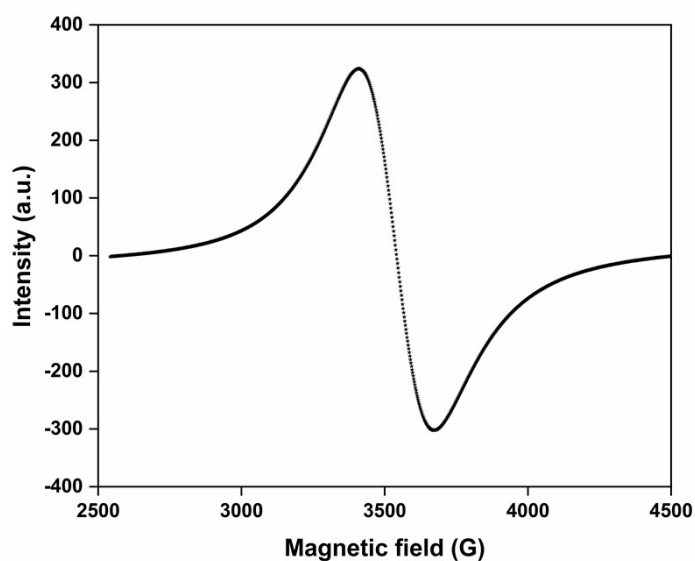

Figure S2. EPR spectrum of Li<sub>2</sub>MnO<sub>3</sub>.

**Table S1.** The peak-fitting results of O 1s high-resolution signal of fresh and gas-exposed samples.

| <b>Samples</b>                                      | <b>Assignment</b> | <b><math>E_B</math> (eV)</b> | <b>FWHM (eV)</b> | <b>At. %</b> |
|-----------------------------------------------------|-------------------|------------------------------|------------------|--------------|
| <b>Li<sub>2</sub>MnO<sub>3</sub></b>                | O–Li, O–Mn        | 530.0                        | 1.2              | 70.9         |
|                                                     | OH surf           | 531.6                        | 1.8              | 22.0         |
|                                                     | water             | 533.0                        | 1.9              | 7.1          |
| <b>Li<sub>2</sub>MnO<sub>3</sub>_SO<sub>2</sub></b> | O–Li, O–Mn        | 530.0                        | 1.2              | 67.6         |
|                                                     | OH surf           | 531.7                        | 1.7              | 20.4         |
|                                                     | water             | 532.8                        | 1.8              | 12.0         |
| <b>Li<sub>2</sub>MnO<sub>3</sub>_H<sub>2</sub>S</b> | O–Li, O–Mn        | 530.1                        | 1.4              | 45.5         |
|                                                     | OH surf           | 531.7                        | 1.7              | 25.3         |
|                                                     | water             | 532.8                        | 1.9              | 29.2         |
| <b>Li<sub>2</sub>MnO<sub>3</sub>_NO</b>             | O–Li, O–Mn        | 530.0                        | 1.2              | 58.1         |
|                                                     | OH surf           | 531.6                        | 1.8              | 20.5         |
|                                                     | water             | 533.1                        | 1.9              | 21.4         |

**Table S2.** The peak-fitting results of Mn 2p<sub>3/2</sub> high-resolution signal of fresh and gas-exposed samples.

| <b>Samples</b>                                      | <b>Assignment</b> | <b><math>E_B</math> (eV)</b> | <b>FWHM (eV)</b> | <b>At. %</b> |
|-----------------------------------------------------|-------------------|------------------------------|------------------|--------------|
| <b>Li<sub>2</sub>MnO<sub>3</sub></b>                | Mn <sup>2+</sup>  | 640.5                        | 1.2              | 10.9         |
|                                                     | Mn <sup>3+</sup>  | 641.8                        | 1.2              | 37.2         |
|                                                     | Mn <sup>4+</sup>  | 642.9                        | 1.8              | 51.9         |
|                                                     | Satellite         | 644.8                        | 2.0              | -            |
| <b>Li<sub>2</sub>MnO<sub>3</sub>_SO<sub>2</sub></b> | Mn <sup>2+</sup>  | 640.8                        | 1.2              | 11.8         |
|                                                     | Mn <sup>3+</sup>  | 642.1                        | 1.2              | 43.4         |
|                                                     | Mn <sup>4+</sup>  | 643.2                        | 1.6              | 44.8         |
|                                                     | Satellite         | 644.3                        | 2.5              | -            |
| <b>Li<sub>2</sub>MnO<sub>3</sub>_H<sub>2</sub>S</b> | Mn <sup>2+</sup>  | 640.9                        | 1.2              | 11.9         |
|                                                     | Mn <sup>3+</sup>  | 642.2                        | 1.5              | 41.8         |
|                                                     | Mn <sup>4+</sup>  | 643.4                        | 1.9              | 46.3         |
|                                                     | Satellite         | 644.3                        | 2.6              | -            |
| <b>Li<sub>2</sub>MnO<sub>3</sub>_NO</b>             | Mn <sup>2+</sup>  | 640.8                        | 1.2              | 10.7         |
|                                                     | Mn <sup>3+</sup>  | 642.0                        | 1.2              | 39.9         |
|                                                     | Mn <sup>4+</sup>  | 643.1                        | 1.7              | 49.4         |
|                                                     | Satellite         | 644.8                        | 2.1              | -            |

**Table S3.** The peak-fitting results of S 2p<sub>3/2</sub> high-resolution signal of fresh and gas-exposed samples.

| <b>Samples</b>                                      | <b>Assignment</b> | <b><math>E_B</math> (eV)</b> | <b>FWHM (eV)</b> | <b>At. %</b> |
|-----------------------------------------------------|-------------------|------------------------------|------------------|--------------|
| <b>Li<sub>2</sub>MnO<sub>3</sub>_SO<sub>2</sub></b> | Sulphate          | 168.8                        | 2.0              | 100          |
| <b>Li<sub>2</sub>MnO<sub>3</sub>_H<sub>2</sub>S</b> | Sulphide          | 162.2                        | 1.1              | 3.4          |
|                                                     | Sulphur           | 164.2                        | 1.7              | 13.4         |
|                                                     | Sulphate          | 169.3                        | 2.1              | 83.3         |

**Table S4.** The peak-fitting results of N 1s high-resolution signal of fresh and gas-exposed samples.

| <b>Sample</b>                           | <b>Assignment</b> | <b><math>E_B</math> (eV)</b> | <b>FWHM (eV)</b> | <b>At. %</b> |
|-----------------------------------------|-------------------|------------------------------|------------------|--------------|
| <b>Li<sub>2</sub>MnO<sub>3</sub>_NO</b> | <b>NO(1)</b>      | 399.7                        | 1.7              | 64.0         |
|                                         | <b>NO(2)</b>      | 401.7                        | 1.7              | 36.0         |
